# Supplementary material for: Occurrence and relative risks for non-vertebral fractures in patients with ankylosing spondylitis compared with the general population: a register-based study from Sweden
Source: HighWire-hosted journal article supplement (doi:10.1136/rmdopen-2022-002753), 2023-02-01
Supplement: rmdopen-2022-002753supp001_data_supplement.pdf [file rmdopen-2022-002753supp001_data_supplement.pdf]

**Supplemental Table 1.** ICD and ATC codes used to identify the patients, fracture outcomes, medical conditions, and treatments.

| National Patient Register (NPR)                    | ICD-10                                                                                                                                                         | Surgical procedure codes |
|----------------------------------------------------|----------------------------------------------------------------------------------------------------------------------------------------------------------------|--------------------------|
| <b>Case definition</b>                             |                                                                                                                                                                |                          |
| Ankylosing spondylitis                             | M45                                                                                                                                                            |                          |
| <b>Fracture outcomes</b>                           |                                                                                                                                                                |                          |
| Non-vertebral fracture (except skull, finger, toe) | S222, S223, S224, S225, S321, S322, S323, S324, S325, S42, S52, S620, S621, S622, S623, S624, S72, S82, S920, S921, S922, S923, S927                           |                          |
| Fracture of humerus, forearm or hip                | S422, S525, S526, S720*, S721*, S722*                                                                                                                          | NFB, NFJ39-NFJ99         |
| Proximal humerus fracture                          | S422                                                                                                                                                           |                          |
| Distal forearm fracture                            | S525, S526                                                                                                                                                     |                          |
| Hip fracture                                       | S720*, S721*, S722*                                                                                                                                            | NFB, NFJ39-NFJ99         |
| Vertebral fracture (sensitivity analysis)          | M485, S120, S121, S122, S220, S221, S320                                                                                                                       |                          |
| <b>Other medical conditions</b>                    |                                                                                                                                                                |                          |
| Any fracture (except skull, finger, toe)           | S12, S22, S32, S42, S52, S620, S621, S622, S623, S624, S628, S72, S82, S920, S921, S922, S923, S927, S929, T02, T08, T10, T12, T142, M485, M800A, M800J, M800K |                          |
| Osteoporosis                                       | M80, M81, M82                                                                                                                                                  |                          |
| Fall injury                                        | S00-T14 + W00-W19 (type of trauma indicating a fall)                                                                                                           |                          |
| Anterior uveitis                                   | H20, H221                                                                                                                                                      |                          |
| Inflammatory bowel disease                         | K50, K51                                                                                                                                                       |                          |
| Psoriasis                                          | L40 and/or an ATC-code for anti-psoriatic drugs                                                                                                                |                          |
| <b>Prescribed Drug Register (PDR)</b>              |                                                                                                                                                                | <b>ATC</b>               |
| <b>AS related</b>                                  |                                                                                                                                                                |                          |
| DMARDs                                             | L04AB01, L04AB02, L04AB04, L04AB05, L04AB06, L04AX01, L04AA13, L04AD01, M01CB01, M01CB03, P01BA01, P01BA02, L04AA32, L01BA01, L04AX03, A07EC01                 |                          |
| TNF inhibitors                                     | L04AB01, L04AB02, L04AB04, L04AB05, L04AB06                                                                                                                    |                          |
| sDMARDs                                            | L04AX01, L04AA13, L04AD01, M01CB01, M01CB03, P01BA01, P01BA02, L04AA32, L01BA01, L04AX03, A07EC01                                                              |                          |
| Peroral glucocorticoids                            | H02AB (only peroral administration)                                                                                                                            |                          |
| Anti-psoriatic drugs                               | D05AX, D05B                                                                                                                                                    |                          |
| <b>Osteoporosis related</b>                        |                                                                                                                                                                |                          |
| Active osteoporosis treatment                      | G03XC, H05AA02, M05BA, M05BB, M05BX03, M05BX04                                                                                                                 |                          |
| Bisphosphonate                                     | M05BA, M05BB                                                                                                                                                   |                          |
| Calcium, D vitamin                                 | A12AX or A11CC + A12AA                                                                                                                                         |                          |
| Estrogens                                          | G03C                                                                                                                                                           |                          |

\*Codes S720, S721 and S722 require a combination with any of the specified surgical procedure codes to represent a hip fracture.

DMARDs, disease modifying anti-rheumatic drugs; SD, standard deviation; sDMARDs, synthetic DMARDs; TNF tumor necrosis factor
