# Supplementary material for: Occurrence and relative risks for non-vertebral fractures in patients with ankylosing spondylitis compared with the general population: a register-based study from Sweden
Source: HighWire-hosted journal article supplement (doi:10.1136/rmdopen-2022-002753), 2023-02-01
Supplement: rmdopen-2022-002753supp002_data_supplement.pdf [file rmdopen-2022-002753supp002_data_supplement.pdf]

**Supplemental Table 2.** IR and IRRs, stratified by sex and age groups for the different non-vertebral fracture outcomes.

|                                            | AS    |        |                  | Matched controls |         |                  | IRR, adjusted   |
|--------------------------------------------|-------|--------|------------------|------------------|---------|------------------|-----------------|
|                                            | Event | PYs    | IR               | Event            | PYs     | IR               |                 |
| <b>Non-vertebral fracture</b>              | 974   | 76 270 | 12.8 (12.0–13.6) | 4106             | 386 499 | 10.6 (10.3–11.0) | 1.2 (1.1–1.3)   |
| Men                                        | 603   | 50 668 | 11.9 (11.0–12.9) | 2572             | 256 076 | 10.0 (9.7–10.4)  | 1.2 (1.1–1.3) * |
| - 18 to 29 years                           | 31    | 3052   | 10.2 (7.1–14.4)  | 161              | 15 020  | 10.7 (9.3–12.4)  | 1.0 (0.6–1.4)   |
| - 30 to 39 years                           | 58    | 7747   | 7.5 (5.8–9.7)    | 316              | 38 340  | 8.2 (7.4–9.2)    | 0.9 (0.7–1.2)   |
| - 40 to 49 years                           | 106   | 11 187 | 9.5 (7.8–11.5)   | 521              | 55 742  | 9.3 (8.6–10.2)   | 1.0 (0.8–1.3)   |
| - 50 to 59 years                           | 140   | 11 811 | 11.9 (10.1–14.0) | 548              | 59 210  | 9.3 (8.5–10.1)   | 1.3 (1.1–1.5)   |
| - 60 to 69 years                           | 150   | 11 167 | 13.4 (11.5–15.8) | 550              | 57 584  | 9.6 (8.8–10.4)   | 1.3 (1.1–1.6)   |
| - 70 to 79 years                           | 73    | 4772   | 15.3 (12.2–19.2) | 314              | 24 863  | 12.6 (11.3–14.1) | 1.1 (0.9–1.5)   |
| - 80+                                      | 45    | 931    | 48.3 (36.1–64.6) | 162              | 5317    | 30.5 (26.1–35.6) | 1.6 (1.1–2.2)   |
| Women                                      | 371   | 25 602 | 14.5 (13.1–16.1) | 1534             | 130 423 | 11.8 (11.1–12.4) | 1.2 (1.1–1.4)   |
| - 18 to 29 years                           | 15    | 1716   | 8.7 (5.3–14.5)   | 45               | 8586    | 5.2 (3.9–7.0)    | 1.6 (0.9–2.9)   |
| - 30 to 39 years                           | 26    | 4175   | 6.2 (4.2–9.1)    | 78               | 20 882  | 3.7 (3.0–4.7)    | 1.7 (1.1–2.6)   |
| - 40 to 49 years                           | 46    | 6481   | 7.1 (5.3–9.5)    | 218              | 32 556  | 6.7 (5.9–7.7)    | 1.1 (0.8–1.4)   |
| - 50 to 59 years                           | 102   | 6090   | 16.7 (13.8–20.3) | 398              | 30 922  | 12.9 (11.7–14.2) | 1.3 (1.0–1.6)   |
| - 60 to 69 years                           | 101   | 4858   | 20.8 (17.1–25.3) | 475              | 25 129  | 18.9 (17.3–20.7) | 1.1 (0.9–1.3)   |
| - 70 to 79 years                           | 60    | 1895   | 31.7 (24.5–40.9) | 208              | 9838    | 21.1 (18.3–24.5) | 1.5 (1.1–2.0)   |
| - 80+                                      | 21    | 386    | 54.5 (34.9–85.1) | 112              | 2510    | 44.6 (37.4–53.3) | 1.2 (0.7–1.9)   |
| <b>Fracture of humerus, forearm or hip</b> | 376   | 78 828 | 4.8 (4.3–5.3)    | 1444             | 397 455 | 3.6 (3.4–3.8)    | 1.3 (1.2–1.4) # |
| Men                                        | 210   | 52 316 | 4.0 (3.5–4.6)    | 703              | 263 908 | 2.7 (2.5–2.9)    | 1.5 (1.3–1.7)   |
| - 18 to 29 years                           | 8     | 3098   | 2.6 (1.3–5.2)    | 19               | 15 415  | 1.2 (0.8–1.9)    | -               |
| - 30 to 39 years                           | 10    | 7907   | 1.3 (0.7–2.4)    | 48               | 39 320  | 1.2 (0.9–1.6)    | 1.0 (0.5–2.1)   |
| - 40 to 49 years                           | 22    | 11 542 | 1.9 (1.3–2.9)    | 98               | 57 479  | 1.7 (1.4–2.1)    | 1.1 (0.7–1.8)   |
| - 50 to 59 years                           | 44    | 12 233 | 3.6 (2.7–4.8)    | 142              | 61 119  | 2.3 (2.0–2.7)    | 1.5 (1.1–2.1)   |
| - 60 to 69 years                           | 63    | 11 627 | 5.4 (4.2–6.9)    | 165              | 59 348  | 2.8 (2.4–3.2)    | 1.9 (1.4–2.5)   |
| - 70 to 79 years                           | 36    | 4909   | 7.3 (5.3–10.1)   | 135              | 25 677  | 5.3 (4.5–6.2)    | 1.3 (0.9–1.9)   |
| - 80+                                      | 27    | 1000   | 27.0 (18.5–39.5) | 96               | 5549    | 17.3 (14.1–21.3) | 1.5 (0.98–2.4)  |
| Women                                      | 166   | 26 512 | 6.3 (5.4–7.3)    | 741              | 133 547 | 5.5 (5.1–6.0)    | 1.1 (0.9–1.3)   |
| - 18 to 29 years                           | 0     | 1750   | 0.0              | 9                | 8688    | 1.0 (0.5–2.0)    | -               |
| - 30 to 39 years                           | 4     | 4247   | 0.9 (0.4–2.5)    | 20               | 21 097  | 0.9 (0.6–1.5)    | -               |
| - 40 to 49 years                           | 16    | 6622   | 2.4 (1.5–3.9)    | 54               | 33 048  | 1.6 (1.2–2.1)    | 1.5 (0.8–2.6)   |
| - 50 to 59 years                           | 41    | 6340   | 6.5 (4.8–8.8)    | 193              | 31 765  | 6.1 (5.3–7.0)    | 1.1 (0.8–1.5)   |
| - 60 to 69 years                           | 60    | 5121   | 11.7 (9.1–15.1)  | 255              | 26 058  | 9.8 (8.6–11.1)   | 1.2 (0.9–1.6)   |
| - 70 to 79 years                           | 27    | 2024   | 13.3 (9.1–19.5)  | 130              | 10 237  | 12.7 (10.7–15.0) | 1.0 (0.7–1.6)   |
| - 80+                                      | 18    | 409    | 44.0 (27.4–70.7) | 80               | 2654    | 30.1 (24.5–37.1) | 1.4 (0.8–2.5)   |
| <b>Proximal humerus fracture</b>           | 94    | 79 857 | 1.2 (1.0–1.4)    | 373              | 401 627 | 0.9 (0.8–1.0)    | 1.2 (0.99–1.6)  |
| Men                                        | 50    | 52 871 | 0.9 (0.7–1.2)    | 182              | 265 825 | 0.7 (0.6–0.8)    | 1.4 (0.99–1.9)  |
| - 18 to 29 years                           | 2     | 3116   | 0.6 (0.2–2.6)    | 1                | 15 459  | 0.1 (0.0–0.5)    | -               |
| - 30 to 39 years                           | 2     | 7940   | 0.3 (0.1–1.0)    | 5                | 39 489  | 0.1 (0.1–0.3)    | -               |
| - 40 to 49 years                           | 4     | 11 590 | 0.3 (0.1–0.9)    | 27               | 57 766  | 0.5 (0.3–0.7)    | -               |
| - 50 to 59 years                           | 10    | 12 354 | 0.8 (0.4–1.5)    | 48               | 61 473  | 0.8 (0.6–1.0)    | 1.0 (0.5–2.0)   |
| - 60 to 69 years                           | 19    | 11 795 | 1.6 (1.0–2.5)    | 47               | 59 870  | 0.8 (0.6–1.0)    | 1.9 (1.1–3.3)   |
| - 70 to 79 years                           | 5     | 4988   | 1.0 (0.4–2.4)    | 36               | 26 047  | 1.4 (1.0–1.9)    | -               |
| - 80+                                      | 8     | 1087   | 7.4 (3.7–14.7)   | 18               | 5720    | 3.1 (1.9–5.1)    | -               |
| Women                                      | 44    | 26 986 | 1.6 (1.2–2.2)    | 191              | 135 801 | 1.4 (1.2–1.6)    | 1.1 (0.8–1.6)   |
| - 18 to 29 years                           | 0     | 1750   | 0.0              | 0                | 8719    | 0.0              | -               |
| - 30 to 39 years                           | 1     | 4252   | 0.2 (0.0–1.7)    | 3                | 21 153  | 0.1 (0.0–0.4)    | -               |
| - 40 to 49 years                           | 3     | 6665   | 0.5 (0.1–1.4)    | 10               | 33 210  | 0.3 (0.2–0.6)    | -               |

|                                |     |        |                  |     |         |                  |                 |
|--------------------------------|-----|--------|------------------|-----|---------|------------------|-----------------|
| - 50 to 59 years               | 7   | 6444   | 1.1 (0.5–2.3)    | 43  | 32 265  | 1.3 (1.0–1.8)    | -               |
| - 60 to 69 years               | 21  | 5270   | 4.0 (2.6–6.1)    | 72  | 26 894  | 2.7 (2.1–3.4)    | 1.5 (0.9–2.4)   |
| - 70 to 79 years               | 8   | 2128   | 3.8 (1.9–7.6)    | 40  | 10 710  | 3.7 (2.8–5.1)    | -               |
| - 80+                          | 4   | 478    | 8.4 (3.1–22.3)   | 23  | 2851    | 8.1 (5.4–12.0)   | -               |
| <b>Distal forearm fracture</b> | 190 | 79 460 | 2.4 (2.1–2.8)    | 777 | 399 604 | 1.9 (1.8–2.1)    | 1.2 (1.0–1.4)   |
| Men                            | 87  | 52 676 | 1.7 (1.3–2.0)    | 320 | 265 087 | 1.2 (1.1–1.3)    | 1.4 (1.1–1.7)   |
| - 18 to 29 years               | 6   | 3101   | 1.9 (0.9–4.3)    | 18  | 15 416  | 1.2 (0.7–1.8)    | -               |
| - 30 to 39 years               | 6   | 7926   | 0.8 (0.3–1.7)    | 39  | 39 350  | 1.0 (0.7–1.4)    | -               |
| - 40 to 49 years               | 19  | 11 553 | 1.6 (1.0–2.6)    | 65  | 57 587  | 1.1 (0.9–1.4)    | 1.5 (0.9–2.5)   |
| - 50 to 59 years               | 21  | 12 304 | 1.7 (1.1–2.6)    | 78  | 61 312  | 1.3 (1.0–1.6)    | 1.3 (0.8–2.1)   |
| - 60 to 69 years               | 25  | 11 749 | 2.1 (1.4–3.1)    | 67  | 59 703  | 1.1 (0.9–1.4)    | 1.9 (1.2–2.9)   |
| - 70 to 79 years               | 5   | 4973   | 1.0 (0.4–2.4)    | 38  | 25 996  | 1.5 (1.1–2.0)    | -               |
| - 80+                          | 5   | 1071   | 4.7 (1.9–11.2)   | 15  | 5724    | 2.6 (1.6–4.3)    | -               |
| Women                          | 103 | 26 784 | 3.8 (3.2–4.7)    | 457 | 134 517 | 3.4 (3.1–3.7)    | 1.1 (0.9–1.4)   |
| - 18 to 29 years               | 0   | 1750   | 0.0              | 9   | 8688    | 1.0 (0.5–2.0)    | -               |
| - 30 to 39 years               | 3   | 4248   | 0.7 (0.2–2.2)    | 16  | 21 105  | 0.8 (0.5–1.2)    | -               |
| - 40 to 49 years               | 13  | 6639   | 2.0 (1.1–3.4)    | 44  | 33 068  | 1.3 (1.0–1.8)    | 1.5 (0.8–2.7)   |
| - 50 to 59 years               | 33  | 6362   | 5.2 (3.7–7.3)    | 140 | 31 923  | 4.4 (3.7–5.2)    | 1.2 (0.8–1.7)   |
| - 60 to 69 years               | 33  | 5226   | 6.3 (4.5–8.9)    | 168 | 26 391  | 6.4 (5.5–7.4)    | 1.0 (0.7–1.4)   |
| - 70 to 79 years               | 12  | 2103   | 5.7 (3.2–10.1)   | 59  | 10 509  | 5.6 (4.3–7.3)    | 1.0 (0.5–1.8)   |
| - 80+                          | 9   | 456    | 19.7 (10.2–38.2) | 21  | 2834    | 7.4 (4.9–11.2)   | -               |
| <b>Hip fracture</b>            | 113 | 79 848 | 1.4 (1.2–1.7)    | 373 | 401 934 | 0.9 (0.8–1.0)    | 1.5 (1.2–1.8) # |
| Men                            | 85  | 52 791 | 1.6 (1.3–2.0)    | 230 | 265 859 | 0.9 (0.8–1.0)    | 1.8 (1.4–2.3)   |
| - 18 to 29 years               | 0   | 3119   | 0.0              | 0   | 15 460  | 0.0              | -               |
| - 30 to 39 years               | 2   | 7952   | 0.3 (0.1–1.0)    | 4   | 39 491  | 0.1 (0.0–0.3)    | -               |
| - 40 to 49 years               | 0   | 11 603 | 0.0              | 6   | 57 836  | 0.1 (0.0–0.2)    | -               |
| - 50 to 59 years               | 13  | 12 357 | 1.1 (0.6–1.8)    | 20  | 61 572  | 0.3 (0.2–0.5)    | 3.1 (1.5–6.2)   |
| - 60 to 69 years               | 22  | 11 766 | 1.9 (1.2–2.8)    | 61  | 59 885  | 1.0 (0.8–1.3)    | 1.7 (1.0–2.8)   |
| - 70 to 79 years               | 28  | 4962   | 5.6 (3.9–8.2)    | 69  | 25 968  | 2.7 (2.1–3.3)    | 2.0 (1.3–3.1)   |
| - 80+                          | 20  | 1032   | 19.4 (12.5–30.2) | 70  | 5646    | 12.4 (9.6–16.0)  | 1.5 (0.9–2.5)   |
| Women                          | 28  | 27 057 | 1.0 (0.7–1.5)    | 143 | 136 074 | 1.1 (0.9–1.3)    | 1.0 (0.6–1.4)   |
| - 18 to 29 years               | 0   | 1750   | 0.0              | 0   | 8719    | 0.0              | -               |
| - 30 to 39 years               | 0   | 4253   | 0.0              | 1   | 21 159  | 0.0 (0.0–0.3)    | -               |
| - 40 to 49 years               | 1   | 6673   | 0.1 (0.0–1.1)    | 0   | 33 231  | 0.0              | -               |
| - 50 to 59 years               | 1   | 6457   | 0.2 (0.0–1.1)    | 13  | 32 362  | 0.4 (0.2–0.7)    | -               |
| - 60 to 69 years               | 7   | 5349   | 1.3 (0.6–2.7)    | 36  | 27 043  | 1.3 (1.0–1.8)    | -               |
| - 70 to 79 years               | 10  | 2123   | 4.7 (2.5–8.7)    | 42  | 10 756  | 3.9 (2.9–5.3)    | 1.2 (0.6–2.3)   |
| - 80+                          | 9   | 452    | 19.9 (10.2–38.8) | 51  | 2804    | 18.2 (13.7–24.1) | -               |

IRs are presented as number of fractures per 1000 person-years at risk. IRRs are adjusted for history of any prior fracture\*Significant interaction between AS status and age. # Significant interaction between AS status and sex.

AS, ankylosing spondylitis; PYs, person-years; IRs, incidence rates; IRRs, incidence rate ratios
