# Supplementary material for: Occurrence and relative risks for non-vertebral fractures in patients with ankylosing spondylitis compared with the general population: a register-based study from Sweden
Source: HighWire-hosted journal article supplement (doi:10.1136/rmdopen-2022-002753), 2023-02-01
Supplement: rmdopen-2022-002753supp003_data_supplement.pdf [file rmdopen-2022-002753supp003_data_supplement.pdf]

**Supplemental Table 3.** IRs and IRRs of secondary non-vertebral fracture outcomes in AS and matched controls.

|                                          | Men                  |                  | Women                |                  |
|------------------------------------------|----------------------|------------------|----------------------|------------------|
|                                          | AS                   | Matched controls | AS                   | Matched controls |
| <b>S22 fracture (thoracic region)</b>    |                      |                  |                      |                  |
| Events, n                                | 110                  | 493              | 37                   | 97               |
| IRs with 95% CI                          | 2.1 (1.7-2.5)        | 1.9 (1.7-2.0)    | 1.4 (1.0-1.9)        | 0.7 (0.6-0.9)    |
| IRRs with 95% CI, crude                  | 1.1 (0.9-1.4)§       | Ref              | <b>1.9 (1.3-2.8)</b> | Ref              |
| IRRs with 95% CI, adjusted#              | 1.1 (0.9-1.4)§       | Ref              | <b>1.9 (1.3-2.7)</b> | Ref              |
| <b>S32 fracture (pelvis region)</b>      |                      |                  |                      |                  |
| Events, n                                | 20                   | 86               | 21                   | 55               |
| IRs with 95% CI                          | 0.4 (0.2-0.6)        | 0.3 (0.3-0.4)    | 0.8 (0.5-1.2)        | 0.4 (0.3-0.5)    |
| IRRs with 95% CI, crude                  | 1.2 (0.7-1.9)        | Ref              | <b>1.9 (1.2-3.1)</b> | Ref              |
| IRRs with 95% CI, adjusted#              | 1.1 (0.7-1.8)        | Ref              | <b>1.8 (1.1-3.0)</b> | Ref              |
| <b>S42 fracture (shoulder/upper arm)</b> |                      |                  |                      |                  |
| Events, n                                | 113                  | 460              | 71                   | 259              |
| IRs with 95% CI                          | 2.1 (1.8-2.6)        | 1.7 (1.6-1.9)    | 2.6 (2.1-3.3)        | 1.9 (1.7-2.2)    |
| IRRs with 95% CI, crude                  | <b>1.2 (1.0-1.5)</b> | Ref              | <b>1.4 (1.1-1.8)</b> | Ref              |
| IRRs with 95% CI, adjusted#              | 1.2 (0.99-1.5)       | Ref              | <b>1.4 (1.0-1.8)</b> | Ref              |
| <b>S52 fracture (forearm)</b>            |                      |                  |                      |                  |
| Events, n                                | 117                  | 446              | 121                  | 552              |
| IRs with 95% CI                          | 2.2 (1.9-2.7)        | 1.7 (1.5-1.9)    | 4.5 (3.8-5.4)        | 4.1 (3.8-4.5)    |
| IRRs with 95% CI, crude                  | <b>1.3 (1.1-1.6)</b> | Ref              | 1.1 (0.9-1.3)        | Ref              |
| IRRs with 95% CI, adjusted#              | <b>1.3 (1.1-1.6)</b> | Ref              | 1.1 (0.9-1.3)        | Ref              |
| <b>S62 fracture (hand except finger)</b> |                      |                  |                      |                  |
| Events, n                                | 72                   | 384              | 35                   | 121              |
| IRs with 95% CI                          | 1.4 (1.1-1.7)        | 1.4 (1.3-1.6)    | 1.3 (0.9-1.8)        | 0.9 (0.7-1.1)    |
| IRRs with 95% CI, crude                  | 0.9 (0.7-1.2)        | Ref              | 1.5 (0.99-2.1)       | Ref              |
| IRRs with 95% CI, adjusted#              | 0.9 (0.7-1.2)        | Ref              | 1.4 (0.99-2.1)       | Ref              |
| <b>S72 fracture (hip/femur)</b>          |                      |                  |                      |                  |
| Events, n                                | 113                  | 313              | 45                   | 175              |
| IRs with 95% CI                          | 2.1 (1.8-2.6)        | 1.2 (1.0-1.3)    | 1.7 (1.2-2.2)        | 1.3 (1.1-1.5)    |
| IRRs with 95% CI, crude                  | <b>1.8 (1.5-2.2)</b> | Ref              | 1.3 (0.9-1.8)        | Ref              |
| IRRs with 95% CI, adjusted#              | <b>1.8 (1.4-2.2)</b> | Ref              | 1.2 (0.9-1.7)        | Ref              |
| <b>S82 fracture (lower leg)</b>          |                      |                  |                      |                  |
| Events, n                                | 122                  | 531              | 82                   | 358              |
| IRs with 95% CI                          | 2.3 (1.9-2.8)        | 2.0 (1.8-2.2)    | 3.1 (2.5-3.8)        | 2.7 (2.4-2.9)    |
| IRRs with 95% CI, crude                  | 1.2 (0.95-1.4)       | Ref              | 1.2 (0.9-1.5)        | Ref              |
| IRRs with 95% CI, adjusted#              | 1.1 (0.9-1.4)        | Ref              | 1.1 (0.9-1.4)        | Ref              |
| <b>S92 fracture (foot except toe)</b>    |                      |                  |                      |                  |
| Events, n                                | 47                   | 242              | 35                   | 135              |
| IRs with 95% CI                          | 0.9 (0.7-1.2)        | 0.9 (0.8-1.0)    | 1.3 (0.9-1.8)        | 1.0 (0.8-1.2)    |
| IRRs with 95% CI, crude                  | 1.0 (0.7-1.3)        | Ref              | 1.3 (0.9-1.9)        | Ref              |
| IRRs with 95% CI, adjusted#              | 1.0 (0.7-1.3)        | Ref              | 1.3 (0.9-1.9)        | Ref              |

IRs are presented as number of fractures per 1000 person-years at risk with 95% confidence interval. Each fracture per site based on the ICD 10 two-digit system (S22, S32, S42, S52, S62, S72, S82, S92) is analyzed separately.

# Adjusted for history of prior fracture at study entry. § Interaction between AS and age.

AS, ankylosing spondylitis; CI, confidence interval; IRs, incidence rates; IRRs, incidence rate ratios; Ref, reference.
