# Supplementary material for: Occurrence and relative risks for non-vertebral fractures in patients with ankylosing spondylitis compared with the general population: a register-based study from Sweden
Source: HighWire-hosted journal article supplement (doi:10.1136/rmdopen-2022-002753), 2023-02-01
Supplement: rmdopen-2022-002753supp004_data_supplement.pdf [file rmdopen-2022-002753supp004_data_supplement.pdf]

**Supplemental Table 4.** IRs and IRRs of the vertebral fracture outcome in AS and matched controls.

|                                                  | AS    |       |               | Matched controls |        |               | IRR, adjusted |
|--------------------------------------------------|-------|-------|---------------|------------------|--------|---------------|---------------|
|                                                  | Event | PYs   | IR            | Event            | PYs    | IR            |               |
| <b>Vertebral fracture</b>                        | 357   | 79000 | 4.5 (4.1-5.0) | 425              | 401559 | 1.1 (1.0-1.2) | 4.2 (3.6-4.8) |
| Men                                              | 259   | 52139 | 5.0 (4.4-5.6) | 291              | 265537 | 1.1 (1.0-1.2) | 4.5 (3.8-5.3) |
| Women                                            | 98    | 26861 | 3.6 (3.0-4.4) | 134              | 136022 | 1.0 (0.8-1.2) | 3.6 (2.8-4.6) |
| <b>Vertebral fracture, sensitivity analyses*</b> | 287   | 74181 | 3.9 (3.4-4.3) | 331              | 355931 | 0.9 (0.8-1.0) | 4.2 (3.6-4.9) |
| Men                                              | 213   | 48895 | 4.4 (3.8-5.0) | 232              | 234446 | 1.0 (0.9-1.1) | 4.4 (3.7-5.3) |
| Women                                            | 74    | 25286 | 2.9 (2.3-3.7) | 99               | 121486 | 0.8 (0.7-1.0) | 3.6 (2.7-4.8) |

IRs are presented as number of fractures per 1000 person-years at risk. IRRs are adjusted for history of any prior fracture.

\*Data for the subgroup of patients and their matched controls without a history of any fracture within the six preceding years before start of follow-up.

AS, ankylosing spondylitis; PYs, person-years; IRs, incidence rates; IRRs, incidence rate ratios
