# Supplementary material for: Occurrence and relative risks for non-vertebral fractures in patients with ankylosing spondylitis compared with the general population: a register-based study from Sweden
Source: HighWire-hosted journal article supplement (doi:10.1136/rmdopen-2022-002753), 2023-02-01
Supplement: rmdopen-2022-002753supp005_data_supplement.pdf [file rmdopen-2022-002753supp005_data_supplement.pdf]

**Supplemental Table 5.** Previous studies of non-vertebral fractures in AS in comparison to general population.

|                             | Country        | Study period          | Study design | Outcome                | Number of study subjects               | Number of fractures     | IR        | Relative effect size                                     | Relative effect size, adjusted |
|-----------------------------|----------------|-----------------------|--------------|------------------------|----------------------------------------|-------------------------|-----------|----------------------------------------------------------|--------------------------------|
| Cooper et al. [21]          | USA            | 1935-1989 (inclusion) | Cohort       | Any limb               | 121 men with AS<br>37 women with AS    | 17<br>7                 | NA        | 0.9 (0.5-1.4) <sup>1</sup><br>1.3 (0.5-2.6) <sup>1</sup> |                                |
| Munoz-Ortego et al. [18]    | Spain          | 2006-2011             | Cohort       | Non-vertebral fracture | 6474 patients with AS / 32346 controls | 218 / 861               | 8.3 / 6.8 | 1.21 (1.04-1.41) <sup>2</sup>                            | 1.19 (1.02-1.39) *             |
| Prieto-Alhambra et al. [17] | Denmark        | 2000                  | Case-control | Non-vertebral fracture | 121291 patients with fracture          | 121 with AS             | NA        | 1.39 (1.12-1.73) <sup>3</sup>                            | 1.05 (0.84-1.32) #             |
| Weiss et al. [19]           | Sweden         | 1987-2004             | Case-control | Hip fracture           | 47282 with hip fracture                | 64 with hospitalized AS | NA        | 2.5 (1.9-3.1) <sup>3</sup>                               |                                |
| Vosse et al. [16]           | United Kingdom | 1988-1999             | Case-control | Forearm fracture       | 44220 with forearm fracture            | 82 with AS              | NA        | 1.30 (0.94-?) <sup>3</sup>                               | 1.21 (0.87-1.69) §             |
|                             |                |                       |              | Hip fracture           | 14387 with hip fracture                | 25 with AS              | NA        | 0.96 (0.56-1.67) <sup>3</sup>                            | 0.77 (0.43-1.37) §             |

IRs are presented as number of fractures per 1000 person-years at risk.

<sup>1</sup> Standardized morbidity ratio, <sup>2</sup> Hazard ratio, <sup>3</sup> Odds ratio

\*Adjusted for body mass index, tobacco smoking, alcohol consumption and oral corticosteroids.

#Adjusted for fracture history, annual income, social status, working status, educational status, number of consultations to general practitioners and practicing specialists, alcoholism and use of oral NSAIDs and oral corticosteroids.

§Adjusted for a wide range of clinical variables and medication associated with the risk of fracture. Smoking history and body mass index were included if entered in the database.

AS, ankylosing spondylitis; IR, incidence rate; NA, not applicable

1. Cooper C, Carbone L, Michet CJ, Atkinson EJ, O'Fallon WM, Melton LJ, 3rd. Fracture risk in patients with ankylosing spondylitis: a population based study. *The Journal of rheumatology*. 1994;21(10):1877-82.
2. Munoz-Ortego J, Vestergaard P, Rubio JB, Wordsworth P, Judge A, Javaid MK, et al. Ankylosing spondylitis is associated with an increased risk of vertebral and nonvertebral clinical fractures: a population-based cohort study. *J Bone Miner Res*. 2014;29(8):1770-6.
3. Prieto-Alhambra D, Munoz-Ortego J, De Vries F, Vosse D, Arden NK, Bowness P, et al. Ankylosing spondylitis confers substantially increased risk of clinical spine fractures: a nationwide case-control study. *Osteoporos Int*. 2015;26(1):85-91.
4. Weiss RJ, Wick MC, Ackermann PW, Montgomery SM. Increased fracture risk in patients with rheumatic disorders and other inflammatory diseases -- a case-control study with 53,108 patients with fracture. *The Journal of rheumatology*. 2010;37(11):2247-50.
5. Vosse D, Landewe R, van der Heijde D, van der Linden S, van Staa TP, Geusens P. Ankylosing spondylitis and the risk of fracture: results from a large primary care-based nested case-control study. *Annals of the rheumatic diseases*. 2009;68(12):1839-42.
